# Supplementary material for: Trends analysis of PM source contributions and chemical tracers in NE Spainduring 2004–2014: a multi-exponential approach
Source: Copernicus journal article supplement (doi:10.5194/acp-16-11787-2016), 2016-09-22
Supplement: Supplementary file 1 [file acp-16-11787-2016-supplement.pdf]

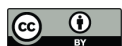

*Supplement of*

## **Trends analysis of PM source contributions and chemical tracers in NE Spain during 2004–2014: a multi-exponential approach**

**Marco Pandolfi et al.**

*Correspondence to:* Marco Pandolfi ([marco.pandolfi@idaea.csic.es](mailto:marco.pandolfi@idaea.csic.es))

The copyright of individual parts of the supplement might differ from the CC-BY 3.0 licence.

Supporting Information

1) Effect of the change of the location of the measuring station in BCN in 2009

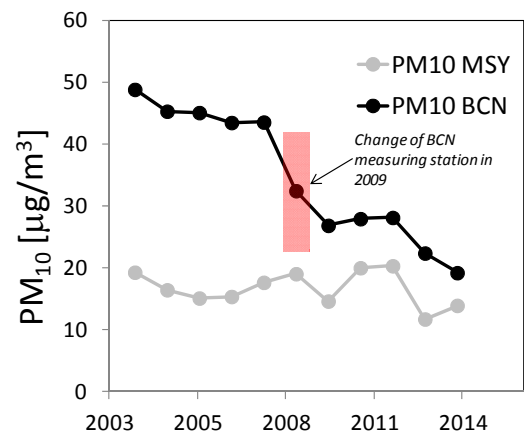

**Figure SI-1:** Trends of PM<sub>10</sub> concentrations from gravimetric measurements at BCN and MSY. Red rectangle highlights the decrease of PM<sub>10</sub> concentration at BCN due to the change of the location of the BCN measuring station in 2009.

## 2) PMF source profiles at BCN and MSY

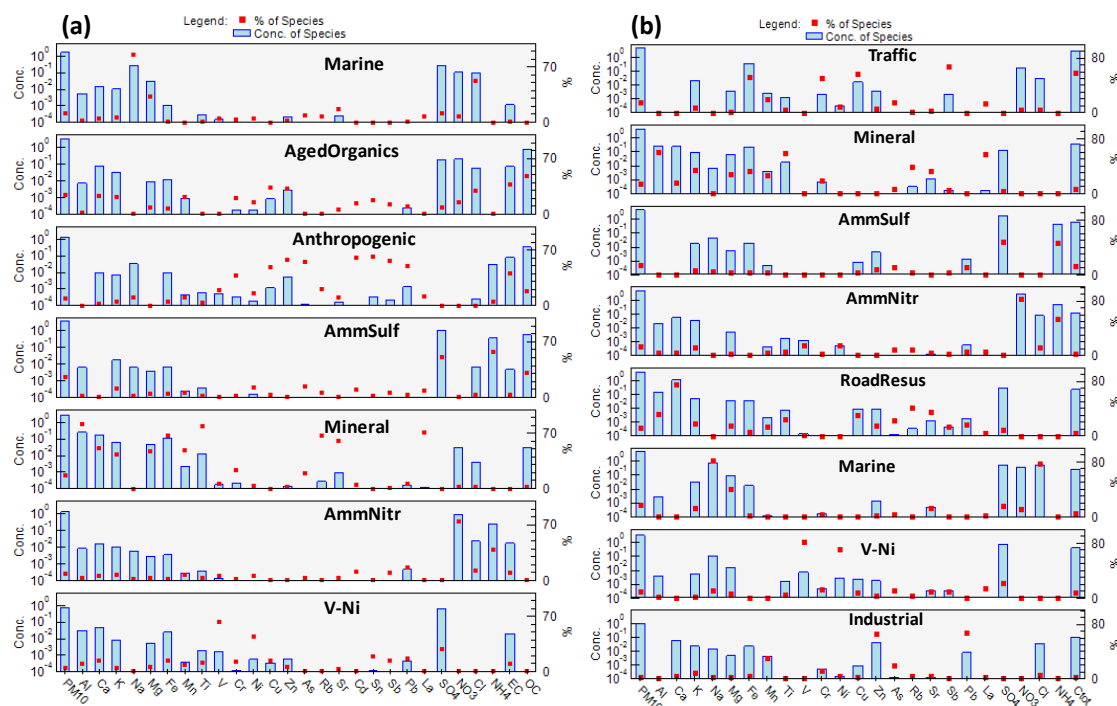

**Figure SI-2:** Chemical profiles of the PMF sources at MSY (a) and BCN (b)

Source profiles from PMF analysis at BCN and MSY. Common sources at both BCN and MSY were: *Secondary Sulfate* (secondary inorganic source traced by  $\text{SO}_4^{2-}$ ,  $\text{NH}_4^+$  with contribution from OC), *Secondary nitrate* (secondary inorganic source traced by  $\text{NO}_3^-$  and  $\text{NH}_4^+$ ), *V-Ni bearing* (traced mainly by V, Ni and  $\text{SO}_4^{2-}$  it represents the direct emissions from heavy oil combustion), *mineral* (traced by typical crustal elements such as Al, Ca, Ti, Rb, Sr), *aged marine* (traced by Na and Cl mainly with contributions from  $\text{SO}_4^{2-}$  and  $\text{NO}_3^-$ ). Non common sources at MSY were: *Industrial/Traffic source* (Anthropogenic source traced by EC, OC, Cr, Cu, Zn, As, Cd, Sn, Sb and Pb includes contributions from anthropogenic sources such as traffic and metallurgic) and *Aged organics* (traced by OC and EC mainly with maxima in summer indicating a biogenic origin). Non common sources at BCN were: *Traffic* (traced by Cnm, Cr, Cu, Sb and Fe mainly and contributing  $5.14 \mu\text{g}/\text{m}^3$  (15.1%)), *Road resuspension* (traced by both crustal elements, mainly Ca, and traffic tracers such as Sb, Cu and Sn and contributing  $4.25 \mu\text{g}/\text{m}^3$  (12.5%)) and *Industrial* (traced by Pb, Cd, As and Zn and contributing  $0.96 \mu\text{g}/\text{m}^3$  (2.8%)).

### 3) OC:EC ratio statistic at Montseny (MSY)

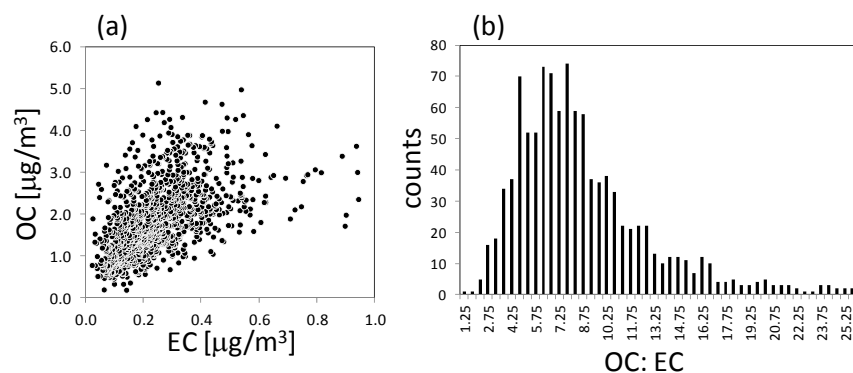

**Figure SI-3:** OC and EC scatterplot (a) and frequency distribution of the OC:EC ratio (b) at Montseny (MSY) station.

Mean and median values of the OC:EC ratio at MSY were 9.1 and 7.8, respectively.

### 4) PMF Barcelona: 2007-2014 (with OC and EC) vs. 2004 – 2014 (with Cnm)

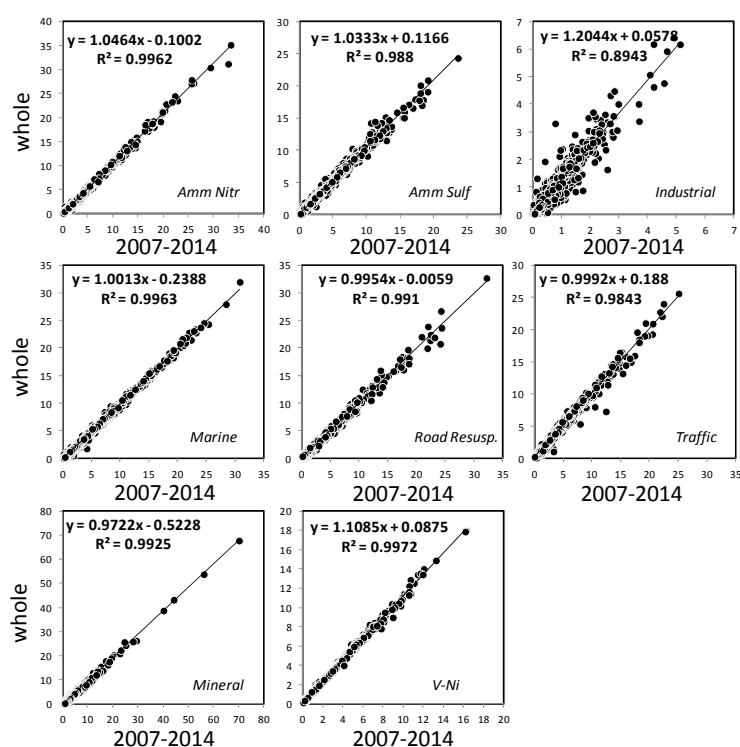

**Figure SI-4:** Comparison between PMF results at BCN obtained using the period 2007-2014 (separate OC and EC measurements available) and using the whole period 2004-2014 (Cnm was used in PMF).

5) **OC:EC ratio statistic at Barcelona (BCN)**

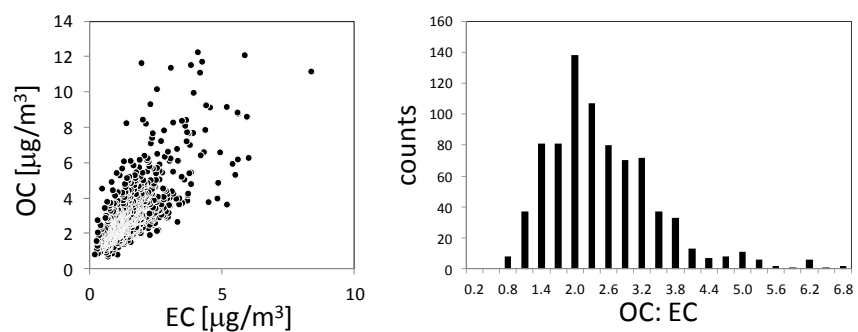

**Figure SI-5:** OC and EC scatterplot (a) and frequency distribution of the OC:EC ratio (b) at Barcelona (BCN) station.
